# Supplementary material
Source: PubMed Central journal article supplement (PMC5278797)
Supplement: Supp_Fig3.pdf [file Supp_Fig3.pdf]

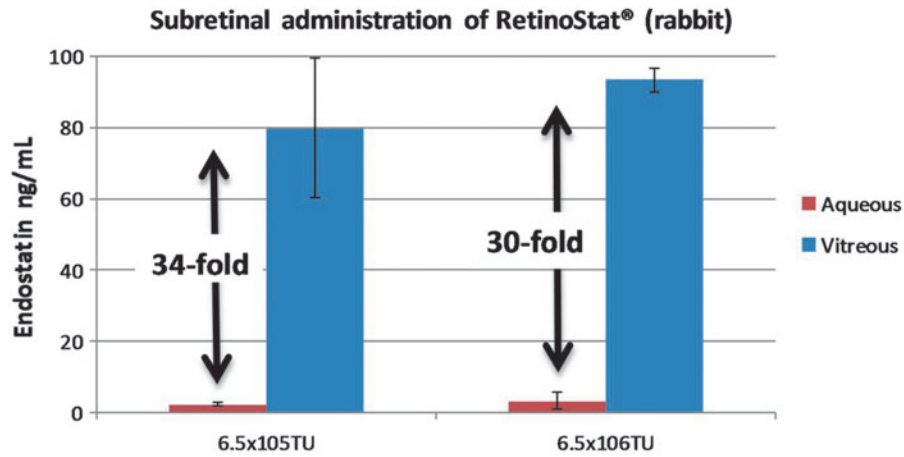

**Supplementary Figure S3.** Mean endostatin expression in vitreous and aqueous humor samples following subretinal injection of RetinoStat vector in the rabbit. Two doses of an early version of RetinoStat (containing the RPE-specific vitelliform macular dystrophy 2 promoter driving transgene expression) was administered to Dutch-belted rabbits ( $n=4/\text{group}$ ) and human endostatin levels in the aqueous and vitreous was measured by ELISA after 3-6 weeks (by which time expression has peaked – Binley *et al*, 2012). Subretinal injections were performed through a sclerotomy using a 37-gauge needle, microvolume catheter and a 1 mL tuberculin syringe.

---
