# Supplementary material
Source: PubMed Central journal article supplement (PMC5278797)
Supplement: Supp_Fig5.pdf [file Supp_Fig5.pdf]

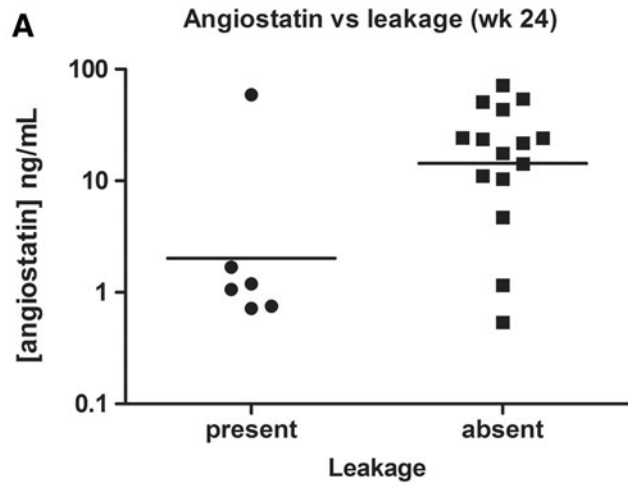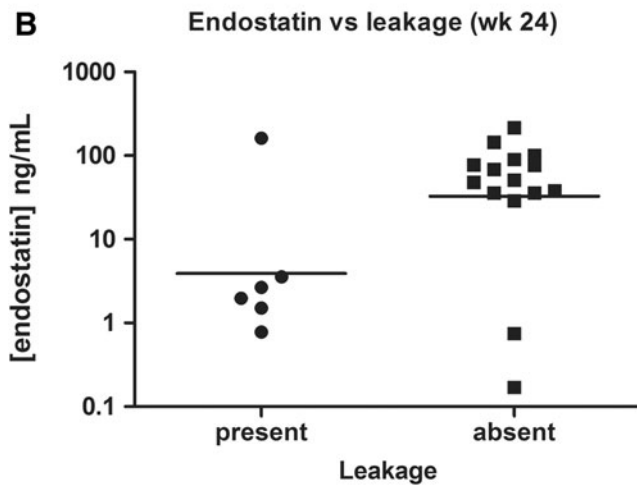

**Supplementary Figure S5.** Aqueous humor angiostatin levels (**A**) or endostatin levels (**B**) in subjects with leakage on fluorescein angiography versus those with no leakage at the week 24 primary endpoint.

---
