# Supplementary material
Source: PubMed Central journal article supplement (PMC5278797)
Supplement: Supp_Table1.pdf [file Supp_Table1.pdf]

**Supplementary Table S1. Demographics and baseline characteristics of study subjects**

| <i>Patient ID</i> | <i>Age (years)</i> | <i>Sex</i> | <i>Race (Caucasian, African American, other)</i> | <i>Duration of AMD (months)</i> | <i>Prior anti-VEGF therapy</i> | <i>BCVA (letters score)</i> | <i>CST (<math>\mu\text{m}</math>)</i> | <i>Presence of intra/subretinal fluid</i> |
|-------------------|--------------------|------------|--------------------------------------------------|---------------------------------|--------------------------------|-----------------------------|---------------------------------------|-------------------------------------------|
| 1A                | 79                 | Male       | Caucasian                                        | 34                              | Yes                            | 32                          | 474                                   | Yes                                       |
| 1B                | 81                 | Female     | Caucasian                                        | 47                              | Yes                            | 17                          | 716                                   | Yes                                       |
| 1C                | 81                 | Female     | Caucasian                                        | — <sup>a</sup>                  | Yes                            | 23                          | 220                                   | Yes                                       |
| 2A                | 84                 | Female     | Caucasian                                        | 24                              | Yes                            | 7                           | 494                                   | Yes                                       |
| 2B                | 79                 | Female     | Caucasian                                        | 55                              | Yes                            | 37                          | 692                                   | Yes                                       |
| 2C                | 88                 | Male       | Caucasian                                        | 28                              | Yes                            | 28                          | 291                                   | Yes                                       |
| 3A                | 95                 | Male       | Caucasian                                        | 124                             | Yes                            | 3                           | 482                                   | Yes                                       |
| 3B                | 70                 | Female     | Caucasian                                        | 58                              | Yes                            | 32                          | 307                                   | Yes                                       |
| 3C                | 64                 | Female     | Caucasian                                        | 20                              | No                             | 14                          | 275                                   | No                                        |
| 4A                | 63                 | Male       | Native American                                  | 6                               | Yes                            | 18                          | 249                                   | No                                        |
| 4B                | 64                 | Male       | African American                                 | 57                              | Yes                            | 36                          | 179                                   | Yes                                       |
| 4C                | 90                 | Female     | African American                                 | 160                             | Yes                            | 9                           | 349                                   | Yes                                       |
| 4D                | 87                 | Female     | Caucasian                                        | 44                              | Yes                            | 22                          | 291                                   | Yes                                       |
| 4E                | 82                 | Female     | Caucasian                                        | 91                              | Yes                            | 40                          | 178                                   | Yes                                       |
| 4F                | 81                 | Female     | Caucasian                                        | 115                             | No                             | 13                          | 137                                   | No                                        |
| 4G                | 71                 | Male       | Caucasian                                        | 14                              | Yes                            | 36                          | 504                                   | Yes                                       |
| 4H                | 85                 | Male       | Caucasian                                        | 10                              | Yes                            | 46                          | 292                                   | Yes                                       |
| 4I                | 75                 | Male       | Caucasian                                        | 139                             | Yes                            | 38                          | 255                                   | No                                        |
| 4J                | 80                 | Male       | Caucasian                                        | 108                             | Yes                            | 30                          | 154                                   | Yes                                       |
| 4K                | 80                 | Male       | Caucasian                                        | 47                              | Yes                            | 58                          | 250                                   | No                                        |
| 4L                | 88                 | Female     | Caucasian                                        | 35                              | Yes                            | 50                          | 229                                   | No                                        |

<sup>a</sup>Disease duration not known.
