# Supplementary material
Source: PubMed Central journal article supplement (PMC5278797)
Supplement: Supp_Table2.pdf [file Supp_Table2.pdf]

**Supplementary Table S2. Nonocular adverse events  
in ≥10% of study patients**

| <i>Nonocular adverse events<br/>in ≥10% of study patients</i>            | <i>Cohort 1 + 2,<br/>N = 6 (%)</i> | <i>Cohort 3 + 4,<br/>N = 15 (%)</i> |
|--------------------------------------------------------------------------|------------------------------------|-------------------------------------|
| Blood and lymphatic system disorders                                     |                                    |                                     |
| Anemia                                                                   | 0 (0.0)                            | 3 (20.0)                            |
| Gastrointestinal disorders                                               |                                    |                                     |
| Dyspepsia                                                                | 1 (16.7)                           | 0 (0.0)                             |
| Infections and infestations                                              |                                    |                                     |
| Acute sinusitis                                                          | 1 (16.7)                           | 0 (0.0)                             |
| Diverticulitis                                                           | 1 (16.7)                           | 0 (0.0)                             |
| Nasopharyngitis                                                          | 1 (16.7)                           | 1 (6.7)                             |
| Pneumonia                                                                | 1 (16.7)                           | 0 (0.0)                             |
| Respiratory tract infection                                              | 1 (16.7)                           | 1 (6.7)                             |
| Urinary tract infection                                                  | 1 (16.7)                           | 2 (13.3)                            |
| Investigations                                                           |                                    |                                     |
| Bacterial test positive                                                  | 1 (16.7)                           | 0 (0.0)                             |
| Blood potassium decreased                                                | 1 (16.7)                           | 0 (0.0)                             |
| Blood pressure increased                                                 | 1 (16.7)                           | 0 (0.0)                             |
| Cells in urine                                                           | 1 (16.7)                           | 2 (13.3)                            |
| Eosinophil percentage increased                                          | 1 (16.7)                           | 0 (0.0)                             |
| Hematocrit decreased                                                     | 2 (33.3)                           | 0 (0.0)                             |
| Hemoglobin decreased                                                     | 2 (33.3)                           | 1 (6.7)                             |
| Oxygen saturation decreased                                              | 1 (16.7)                           | 0 (0.0)                             |
| Urine analysis abnormal                                                  | 1 (16.7)                           | 0 (0.0)                             |
| White blood cells urine positive                                         | 1 (16.7)                           | 0 (0.0)                             |
| Musculoskeletal and connective tissue disorders                          |                                    |                                     |
| Arthralgia                                                               | 0 (0)                              | 2 (13.3)                            |
| Back pain                                                                | 0 (0)                              | 2 (13.3)                            |
| Osteoarthritis                                                           | 1 (16.7)                           | 1 (6.7)                             |
| Neoplasms benign, malignant and unspecified (including cysts and polyps) |                                    |                                     |
| Basal cell carcinoma                                                     | 1 (16.7)                           | 0 (0.0)                             |
| Intraductal proliferative breast lesion                                  | 1 (16.7)                           | 0 (0.0)                             |
| Nervous system disorders                                                 |                                    |                                     |
| Headache                                                                 | 0 (0)                              | 2 (13.3)                            |
| Psychiatric disorders                                                    |                                    |                                     |
| Hallucination                                                            | 1 (16.7)                           | 0 (0.0)                             |
| Renal and urinary disorders                                              |                                    |                                     |
| Urinary retention                                                        | 1 (16.7)                           | 0 (0.0)                             |
| Vascular disorders                                                       |                                    |                                     |
| Hypertension                                                             | 2 (33.3)                           | 0 (0.0)                             |
