# Supplementary material
Source: PubMed Central journal article supplement (PMC5278797)

## Supplementary Data

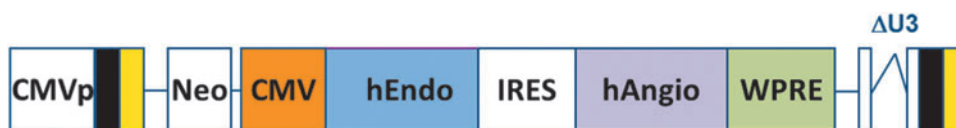

**Supplementary Figure S1.** Schematic of RetinoStat<sup>®</sup> genome.

---

Supplement: Supp_Fig1.pdf [file Supp_Fig1.pdf]
